# Supplementary material for: Copy number variant analysis from exome data in 349 patients with epileptic encephalopathy
Source: PubMed Central journal article supplement — Ann Neurol. 2015 Jul 1;78(2):323–8. doi: 10.1002/ana.24457 (PMC4646089; doi:10.1002/ana.24457), 2015-07-01
Supplement: NIHMS735971-supplement-Supplement.pdf [file NIHMS735971-supplement-Supplement.pdf]

#### SUPPLEMENTARY METHODS

Copy number variations (CNVs) were called from exome data using the CoNIFER pipeline, described by Krumm and colleagues [5]. Exome reads were mapped to exons and 300 bp flanking sequence of the repeat-masked hg19 reference genome using mrsFAST. RPKM (mapped reads per kilobase per million reads) values were calculated for 194,075 exome capture targets and minimized systematic noise and bias by removing the first 30 SVD components. CNV calls were generated using the conifer-tools package, which implements DNACopy (REF Venkatraman 2007), with the following filtering criteria: CNVs of 3-5 probes average SVD-transformed signal  $>1$ ; CNVs of 6 or greater probes, average signal  $> 0.5$ . CNVs more than 50% in repetitive or duplicated genomic space were removed. CNV calls were manually curated, and curated calls were compared to control CNV datasets to filter out common CNVs present in  $>1\%$  of the general population. Control CNV datasets included (i) CNV calls from the Atherosclerosis Risk in Communities (ARIC) Study (n=11,305) analyzed using Affymetrix AFFY\_6.0 SNP microarray and (ii) CNV calls from the NHLBI GO Exome Sequencing Project (ESP, n=2,972) from CoNIFER analysis of exome sequence data.

SNP array analysis: Copy number variants (CNVs) were called from the SNP microarray genotype data using the method described previously [2323]. Briefly, a Hidden Markov Model (HMM) integrating both B allele frequencies and intensity values (logR) was used to identify segments of individual chromosomes exhibiting a duplication or a deletion. All 311 samples were filtered by a maximal genome-wide logR standard deviation of 0.25. CNVs called by the HMM were then manually curated to remove known artifacts and large false positives ( $>100$  probes and  $>1$  Mb), followed by user-guided merging of calls within 1Mbp to correct for contiguous events broken up due to HMM overfragmentation. Samples with greater than 18 calls, 1 large false positive, or 1 artifact were removed from analysis following the merging step. After the final filtering, 483 calls remained from 161 samples. Quantitative PCR was performed for a subset of predicted CNVs that were  $<10$  kb and for which available oligonucleotide and SNP array data had too few probes ( $<10$ ) to reliably confirm the CNV.

SUPPLEMENTARY TABLE 1: Samples included in analysis

| Coriell ID |            |            |            |                          |
|------------|------------|------------|------------|--------------------------|
| Trio ID    | Proband    | Father     | Mother     | Included in Ref X (Nat)? |
| aa         | ND27062    | ND25915    | ND25914    | Y                        |
| ac         | ND25793    | ND26080    | ND26079    | Y                        |
| ad         | ND26087    | ND26085    | ND26086    | Y                        |
| af         | ND24260    | ND25361    | ND24265    | Y                        |
| ag         | ND27949    | ND26631    | ND26629    | Y                        |
| ah         | ND26900    | ND26899    | ND26895    | Y                        |
| ahc        | EPGP015825 | EPGP015827 | EPGP015826 | N                        |
| ahd        | EPGP016251 | EPGP016253 | EPGP016252 | N                        |
| ahf        | ND38883    | ND32228    | ND32227    | N                        |
| ahh        | ND39531    | ND40447    | ND40448    | N                        |
| ahj        | ND40144    | ND37823    | ND37825    | N                        |
| ahk        | ND38557    | ND39279    | ND38556    | N                        |
| ahl        | ND37548    | ND37646    | ND37647    | N                        |
| ahl        | EPGP014670 | ND39608    | ND39416    | N                        |
| ahm        | ND37023    | ND37022    | ND37024    | N                        |
| ahn        | ND37134    | ND37104    | ND37100    | N                        |
| aho        | ND37815    | ND37838    | ND37734    | N                        |
| ahp        | ND37447    | ND37449    | ND37448    | N                        |
| ahq        | ND37431    | ND37432    | ND37433    | N                        |
| ahr        | ND37295    | ND37243    | ND37230    | N                        |
| ahs        | ND38114    | ND38112    | ND38113    | N                        |
| aht        | ND37900    | ND38307    | ND38308    | N                        |
| ahu        | ND37656    | ND37853    | ND37854    | N                        |
| ahv        | ND38771    | ND37749    | ND37748    | N                        |
| ahw        | ND38667    | ND38677    | ND38665    | N                        |
| ahx        | ND38461    | ND38956    | ND38464    | N                        |
| ahy        | ND37868    | ND38255    | ND38254    | N                        |
| ahz        | ND39665    | ND37867    | ND37866    | N                        |
| ai         | ND26970    | ND26969    | ND26971    | Y                        |
| aia        | ND38309    | ND38085    | ND38079    | N                        |
| aiab       | ND39001    | ND39000    | ND38999    | N                        |
| aic        | ND39199    | ND38194    | ND38198    | N                        |
| aie        | ND38846    | ND38844    | ND38845    | N                        |
| aie        | ND38558    | ND39337    | ND38913    | N                        |
| aif        | ND38410    | ND38411    | ND38412    | N                        |
| aig        | ND38653    | ND38654    | ND38655    | N                        |
| aih        | ND38650    | ND38651    | ND38652    | N                        |
| aii        | ND38461    | ND38462    | ND38463    | N                        |
| aij        | ND38912    | ND38967    | ND38966    | N                        |
| aij        | ND38845    | ND38844    | ND38847    | N                        |
| aij        | ND38847    | ND38845    | ND38846    | N                        |
| aim        | ND38768    | ND38766    | ND38767    | N                        |
| ain        | ND39695    | ND39710    | ND39693    | N                        |
| aio        | ND39662    | ND39427    | ND39426    | N                        |
| aip        | ND39284    | ND39618    | ND39617    | N                        |
| aiq        | ND39196    | ND39456    | ND39197    | N                        |
| aiq        | ND39393    | ND39392    | ND39394    | N                        |
| aia        | ND39474    | ND39470    | ND39473    | N                        |
| ait        | ND39708    | ND39812    | ND39709    | N                        |
| aiu        | ND39838    | ND39834    | ND39835    | N                        |
| aiv        | ND40021    | ND40039    | ND40038    | N                        |
| aiw        | ND37357    | ND37963    | ND37962    | N                        |
| aix        | ND37555    | ND37553    | ND37554    | N                        |
| aiy        | ND37815    | ND37817    | ND37812    | N                        |
| aj         | ND26974    | ND26973    | ND26972    | Y                        |
| aja        | ND37535    | ND37424    | ND37425    | N                        |
| ajb        | ND37855    | ND37857    | ND37856    | N                        |
| ajc        | ND38132    | ND38131    | ND38127    | N                        |
| ajd        | ND38656    | ND38196    | ND38197    | N                        |
| aje        | ND38384    | ND38925    | ND38386    | N                        |
| ajf        | ND38610    | ND38588    | ND38586    | N                        |
| ajg        | ND38706    | ND38707    | ND38708    | N                        |
| ajh        | ND39737    | ND39736    | ND39735    | N                        |
| aji        | ND37189    | ND37188    | ND37190    | N                        |
| ajj        | ND39606    | ND39605    | ND39604    | N                        |
| ajk        | ND37747    | ND40236    | ND37764    | N                        |
| ajl        | ND40148    | ND40153    | ND40154    | N                        |
| ak         | ND39086    | ND27136    | ND27135    | Y                        |
| al         | ND27253    | ND27234    | ND27233    | Y                        |
| am         | ND27474    | ND27280    | ND27281    | Y                        |
| an         | ND27732    | ND27730    | ND27731    | Y                        |
| ao         | ND29711    | ND27972    | ND27973    | Y                        |
| ap         | ND29304    | ND27987    | ND27986    | N                        |
| aq         | ND34430    | ND28025    | ND28024    | Y                        |
| ar         | ND27915    | ND28128    | ND28129    | Y                        |
| as         | ND39015    | ND28222    | ND28221    | Y                        |
| at         | ND28472    | ND28470    | ND28471    | N                        |
| au         | ND28478    | ND28480    | ND28479    | Y                        |
| av         | ND28661    | ND28663    | ND28660    | Y                        |
| ax         | ND28699    | ND28701    | ND28700    | Y                        |
| ay         | ND27841    | ND28748    | ND27840    | Y                        |
| az         | ND28844    | ND28846    | ND28815    | Y                        |
| b          | ND21451    | ND21448    | ND21012    | Y                        |
| ba         | ND31134    | ND28820    | ND28821    | Y                        |
| bc         | ND28982    | ND28981    | ND28983    | Y                        |
| bcb        | ND40745    | ND38150    | ND38149    | N                        |
| bcw        | ND40262    | ND39396    | ND39397    | N                        |
| bcz        | ND39270    | ND39271    | ND39269    | N                        |
| bda        | ND40292    | ND40294    | ND40295    | N                        |
| bdb        | ND40432    | ND40300    | ND40301    | N                        |
| bde        | ND40833    | ND40830    | ND40829    | N                        |
| be         | ND29057    | ND29048    | ND29046    | Y                        |
| bf         | ND29047    | ND29056    | ND29049    | N                        |
| bg         | ND29900    | ND29093    | ND29094    | Y                        |
| bh         | ND27521    | ND29124    | ND27520    | Y                        |
| bi         | ND29126    | ND29128    | ND29127    | Y                        |
| bj         | ND29199    | ND29198    | ND29197    | Y                        |
| bk         | ND29258    | ND29255    | ND29259    | Y                        |
| bl         | ND29267    | ND29269    | ND29268    | Y                        |
| bm         | ND33520    | ND29320    | ND33521    | Y                        |
| bn         | ND29319    | ND29321    | ND29322    | Y                        |
| bo         | ND33012    | ND29324    | ND33002    | N                        |
| bq         | ND29810    | ND29348    | ND29349    | Y                        |
| br         | ND29352    | ND29353    | ND29351    | Y                        |
| bs         | ND29366    | ND29368    | ND29367    | Y                        |
| bt         | ND29377    | ND29375    | ND29376    | Y                        |
| bu         | ND29378    | ND29380    | ND29379    | Y                        |
| bv         | ND29383    | ND29382    | ND29381    | Y                        |
| bw         | ND29514    | ND29512    | ND29513    | Y                        |
| bx         | ND29752    | ND29782    | ND29781    | N                        |
| by         | ND29866    | ND29865    | ND29867    | Y                        |
| bz         | ND29885    | ND29882    | ND29883    | N                        |
| ca         | ND29292    | ND29888    | ND29291    | Y                        |
| cb         | ND29975    | ND29974    | ND29973    | Y                        |
| cd         | ND32722    | ND30001    | ND30000    | N                        |
| ce         | ND32131    | ND30050    | ND29809    | Y                        |

| Coriell ID |         |         |         |                          |
|------------|---------|---------|---------|--------------------------|
| Trio ID    | Proband | Father  | Mother  | Included in Ref X (Nat)? |
| cf         | ND30071 | ND30070 | ND30069 | Y                        |
| cg         | ND30610 | ND30127 | ND30128 | Y                        |
| ch         | ND30474 | ND30214 | ND30213 | Y                        |
| ci         | ND30279 | ND30274 | ND30273 | Y                        |
| cj         | ND30280 | ND30277 | ND30276 | Y                        |
| ck         | ND30302 | ND30304 | ND30303 | Y                        |
| cm         | ND30377 | ND30376 | ND30375 | Y                        |
| cn         | ND30384 | ND30382 | ND30381 | Y                        |
| co         | ND29305 | ND30418 | ND29306 | Y                        |
| cp         | ND30431 | ND30432 | ND30433 | Y                        |
| cq         | ND31120 | ND30435 | ND30434 | Y                        |
| cr         | ND30441 | ND30443 | ND30442 | Y                        |
| cs         | ND30485 | ND30486 | ND30487 | Y                        |
| ct         | ND30552 | ND30551 | ND30565 | Y                        |
| cu         | ND30679 | ND30673 | ND30674 | Y                        |
| cv         | ND30439 | ND30686 | ND30440 | Y                        |
| cx         | ND30880 | ND30856 | ND30855 | Y                        |
| cy         | ND31770 | ND30989 | ND30993 | Y                        |
| cz         | ND30575 | ND31078 | ND30572 | Y                        |
| d          | ND24539 | ND21692 | ND21691 | Y                        |
| da         | ND31115 | ND31114 | ND31113 | Y                        |
| db         | ND31192 | ND31191 | ND31193 | Y                        |
| dc         | ND31228 | ND31227 | ND31226 | Y                        |
| dd         | ND31305 | ND31301 | ND31299 | Y                        |
| de         | ND31308 | ND31306 | ND31307 | Y                        |
| df         | ND31362 | ND31366 | ND31365 | Y                        |
| dg         | ND36211 | ND31459 | ND31474 | Y                        |
| dh         | ND31702 | ND31605 | ND31603 | Y                        |
| di         | ND31635 | ND31637 | ND31636 | Y                        |
| dj         | ND32121 | ND31698 | ND31699 | Y                        |
| dk         | ND30090 | ND31772 | ND30089 | Y                        |
| dl         | ND30831 | ND31785 | ND30832 | Y                        |
| dm         | ND30874 | ND31818 | ND30877 | Y                        |
| dn         | ND31821 | ND31820 | ND31819 | Y                        |
| do         | ND31831 | ND31829 | ND31830 | Y                        |
| dq         | ND31899 | ND31909 | ND31910 | Y                        |
| dr         | ND31241 | ND31933 | ND31240 | Y                        |
| ds         | ND31602 | ND20000 | ND31601 | Y                        |
| dt         | ND31470 | ND31200 | ND31208 | Y                        |
| du         | ND32641 | ND32069 | ND32064 | Y                        |
| dv         | ND32065 | ND32063 | ND32064 | Y                        |
| dw         | ND32132 | ND32134 | ND32133 | Y                        |
| dx         | ND30482 | ND32385 | ND30473 | Y                        |
| dz         | ND32398 | ND32397 | ND32396 | Y                        |
| e          | ND21751 | ND21749 | ND21750 | Y                        |
| eb         | ND32464 | ND32618 | ND32465 | Y                        |
| ec         | ND32424 | ND32429 | ND32440 | Y                        |
| ed         | ND33651 | ND32640 | ND32659 | Y                        |
| ee         | ND32757 | ND32755 | ND32756 | Y                        |
| ef         | ND32671 | ND32843 | ND32678 | Y                        |
| eg         | ND33197 | ND33195 | ND33196 | Y                        |
| eh         | ND33296 | ND33298 | ND33297 | Y                        |
| ei         | ND35496 | ND33299 | ND33261 | N                        |
| ej         | ND33342 | ND33434 | ND33041 | N                        |
| ek         | ND35845 | ND33454 | ND33453 | Y                        |
| el         | ND33322 | ND33461 | ND33460 | Y                        |
| em         | ND34128 | ND33822 | ND33820 | Y                        |
| en         | ND34077 | ND33883 | ND33891 | Y                        |
| es         | ND29429 | ND33900 | ND29428 | Y                        |
| et         | ND35575 | ND33999 | ND33998 | Y                        |
| ev         | ND34548 | ND34022 | ND34027 | N                        |
| ew         | ND34144 | ND34143 | ND34142 | Y                        |
| ex         | ND34274 | ND34271 | ND34272 | Y                        |
| ey         | ND34304 | ND34320 | ND34302 | Y                        |
| ez         | ND34338 | ND34340 | ND34339 | Y                        |
| f          | ND22993 | ND22994 | ND23034 | Y                        |
| fa         | ND34404 | ND34402 | ND34396 | Y                        |
| fb         | ND34548 | ND34402 | ND34397 | Y                        |
| fc         | ND34401 | ND34407 | ND34397 | Y                        |
| fd         | ND36066 | ND34504 | ND34505 | Y                        |
| fe         | ND34750 | ND34753 | ND34768 | Y                        |
| ff         | ND34116 | ND34857 | ND34441 | Y                        |
| fg         | ND34968 | ND34946 | ND34947 | Y                        |
| fh         | ND34962 | ND34963 | ND34969 | Y                        |
| fi         | ND35054 | ND35052 | ND35051 | Y                        |
| fj         | ND34680 | ND35067 | ND34679 | Y                        |
| fk         | ND35150 | ND35148 | ND35149 | Y                        |
| fl         | ND35197 | ND35196 | ND35198 | Y                        |
| fm         | ND35151 | ND35222 | ND35223 | Y                        |
| fn         | ND28895 | ND35345 | ND28973 | Y                        |
| fo         | ND35498 | ND35496 | ND35497 | N                        |
| fp         | ND35907 | ND35908 | ND35909 | Y                        |
| fq         | ND35951 | ND36021 | ND35980 | Y                        |
| fr         | ND36158 | ND36156 | ND36157 | Y                        |
| fs         | ND36206 | ND36207 | ND36208 | Y                        |
| ft         | ND36367 | ND36368 | ND36369 | Y                        |
| fu         | ND36387 | ND36385 | ND36386 | Y                        |
| fv         | ND35351 | ND36497 | ND35722 | Y                        |
| fw         | ND23221 | ND23223 | ND23222 | Y                        |
| fx         | ND36561 | ND36560 | ND36563 | Y                        |
| fy         | ND36629 | ND36628 | ND36627 | Y                        |
| gz         | ND27552 | ND27554 | ND27553 | Y                        |
| gs         | ND29374 | ND2981  | ND2995  | Y                        |
| gt         | ND23319 | ND23321 | ND23320 | Y                        |
| gu         | ND24053 | ND24055 | ND24054 | Y                        |
| gv         | ND24070 | ND24075 | ND24069 | Y                        |
| gw         | ND23828 | ND24283 | ND23827 | Y                        |
| gx         | ND24447 | ND24445 | ND24446 | Y                        |
| gy         | ND24471 | ND24472 | ND25665 | Y                        |
| gz         | ND24645 | ND24643 | ND24644 | Y                        |
| h          | ND24646 | ND24639 | ND24641 | Y                        |
| ha         | ND24762 | ND24764 | ND24763 | Y                        |
| hb         | ND23543 | ND25364 | ND25363 | Y                        |
| hc         | ND25442 | ND25441 | ND25443 | Y                        |
| hd         | ND25544 | ND25542 | ND25543 | Y                        |
| he         | ND24647 | ND25597 | ND24640 | N                        |
| hf         | ND23813 | ND25797 | ND25817 | Y                        |
| hg         | ND29554 | ND25816 | ND29555 | Y                        |
| hh         | ND28841 | ND25937 | ND26273 | N                        |
| hi         | ND26319 | ND26320 | ND26321 | N                        |
| hj         | ND26363 | ND26364 | ND26362 | N                        |
| hk         | ND23465 | ND23489 | ND23464 | Y                        |
| hl         | ND27753 | ND26479 | ND27754 | Y                        |

| Coriell ID |         |         |         |                          |
|------------|---------|---------|---------|--------------------------|
| Trio ID    | Proband | Father  | Mother  | Included in Ref X (Nat)? |
| hc         | ND25992 | ND27008 | ND27009 | Y                        |
| hd         | ND27109 | ND27152 | ND27153 | Y                        |
| he         | ND27155 | ND27157 | ND27156 | Y                        |
| hf         | ND28840 | ND27329 | ND27328 | Y                        |
| hg         | ND29877 | ND27339 | ND27340 | N                        |
| hh         | ND27345 | ND27346 | ND27344 | Y                        |
| hi         | ND27497 | ND27500 | ND27501 | Y                        |
| hj         | ND27594 | ND27593 | ND27597 | Y                        |
| hk         | ND27637 | ND27638 | ND27629 | Y                        |
| hl         | ND27682 | ND27683 | ND27154 | Y                        |
| hm         | ND28051 | ND27711 | ND27710 | Y                        |
| hn         |         |         |         |                          |

**Supplementary Table 2: Validated inherited CNVs in 43 individuals**

| trio | Predicted by CoNIFER |           |           |           | Breakpoints by chromosome array |           |         | event type  | inheritance | validation platform | genes         |
|------|----------------------|-----------|-----------|-----------|---------------------------------|-----------|---------|-------------|-------------|---------------------|---------------|
|      | chr                  | start     | stop      | size (bp) | start                           | stop      | size    |             |             |                     |               |
| ac   | chr23                | 74513306  | 74599033  | 85727     | 74505779                        | 74606768  | 100989  | duplication | mother      | CGH                 | UPRT,ZDHHC1   |
| ah   | chr3                 | 184953077 | 187387065 | 2433988   | 185131753                       | 187214923 | 2083170 | duplication | father      | CGH, SNP            | EHHADH,MAPK   |
| ai   | chr7                 | 16918133  | 17385775  | 467642    | 16918472                        | 17407061  | 488589  | duplication | mother      | SNP                 | AGR3,AHR,LOC  |
| aq   | chr3                 | 45744929  | 45936446  | 191517    | 45671268                        | 45871203  | 199935  | deletion    | mother      | CGH, SNP            | SACM1L,SLC6A  |
| aq   | chr10                |           |           |           | 15009109                        | 15060883  | 51774   | duplication | father      | SNP                 | MEIG1         |
| be   | chr9                 | 108151313 | 108301632 | 150319    | 108206884                       | 108302402 | 95518   | deletion    | father      | CGH                 | FSD1L         |
| bs   | chr16                | 2908023   | 3001208   | 93185     | 2928181                         | 2998053   | 69872   | deletion    | father      | CGH                 | FLYWCH2,FLYV  |
| bs   | chr22                | 22300214  | 22599926  | 299712    | 22313954                        | 22560977  | 247023  | duplication | father      | SNP                 | PPM1F,TOP3B   |
| bs   | chr7                 | 110303109 | 111375223 | 1072114   | 110965837                       | 111321438 | 355601  | deletion    | mother      | CGH                 | IMMP2L        |
| cr   | chr9                 | 132482874 | 132838741 | 355867    | 132507232                       | 132783902 | 276670  | duplication | mother      | CGH                 | PRRX2,PTGES,  |
| cz   | chr7                 |           |           |           | 7120557                         | 7313294   | 192737  | duplication | mother      | SNP                 | C1GALT1       |
| cz   | chr21                | 40777771  | 40816128  | 38357     | 40776019                        | 40809714  | 33695   | duplication | father      | CGH                 | LCA5L         |
| db   | chr5                 | 110411643 | 110454818 | 43175     | 110416995                       | 110446579 | 29584   | duplication | mother      | CGH                 | WDR36         |
| dg   | chr1                 | 92224169  | 92327201  | 103032    | 91988685                        | 92130915  | 142230  | deletion    | mother      | CGH                 | LOC10028943:  |
| dz   | chr1                 | 169558089 | 169586652 | 28563     | 169574047                       | 169580274 | 6227    | deletion    | mother      | CGH                 | SELP          |
| eb   | chr17                | 3500211   | 3566189   | 65978     | 3492855                         | 3560888   | 68033   | deletion    | father      | CGH                 | TRPV1,SHPK,C  |
| ff   | chr9                 | 213108    | 340321    | 127213    | 207735                          | 361025    | 153290  | duplication | father      | CGH                 | C9ORF66,DOC   |
| fh   | chr7                 | 17349559  | 17385775  | 36216     | 17040227                        | 17436278  | 396051  | duplication | mother      | CGH, SNP            | AHR           |
| fp   | chr21                | 33355838  | 33651376  | 295538    | 33632971                        | 33645249  | 12278   | duplication | mother      | CGH                 | HUNK,NCRNA    |
| fu   | chr22                | 22300214  | 22599271  | 299057    | 24346991                        | 24395156  | 48165   | deletion    | mother      | CGH                 | PPM1F,TOP3B   |
| fw   | chr14                | 61744090  | 62463260  | 719170    | 61607162                        | 62476906  | 869744  | duplication | mother      | CGH                 | HIF1A,PRKCH,S |
| fy   | chr1                 | 162467654 | 162482613 | 14959     | 162411286                       | 162486355 | 75069   | duplication | father      | CGH                 | UHMK1         |
| fy   | chrX                 | 32456357  | 32662430  | 206073    | 32446527                        | 32628462  | 181935  | deletion    | father      | CGH                 | DMD           |
| gc   | chr21                | 35742765  | 35986745  | 243980    | 34641156                        | 34835149  | 193993  | duplication | father      | CGH                 | FAM165B,KCN   |
| gi   | chr1                 | 92327027  | 92613395  | 286368    | 92303122                        | 92578324  | 275202  | duplication | mother      | CGH                 | TGFBR3,BRDT,  |
| gk   | chr1                 | 206241532 | 206332103 | 90571     | 206311019                       | 206331706 | 20687   | deletion    | father      | CGH                 | CTSE          |
| gk   | chr17                | 72199794  | 72667797  | 468003    | 71841082                        | 72718161  | 877079  | duplication | father      | CGH                 | BTBD17,C17O   |
| gk   | chr19                | 40971516  | 41029546  | 58030     | 40969518                        | 41038340  | 68822   | duplication | mother      | CGH                 | SPTBN4        |
| gq   | chr1                 | 190066796 | 197522242 | 7455446   | 187227118                       | 196024958 | 8797840 | duplication | father      | CGH, SNP            | ASPM,B3GALT   |

| Predicted by CoNIFER |       |           |           |           | Breakpoints by chromosome array |           |        |             |             |                     |               |
|----------------------|-------|-----------|-----------|-----------|---------------------------------|-----------|--------|-------------|-------------|---------------------|---------------|
| trio                 | chr   | start     | stop      | size (bp) | start                           | stop      | size   | event type  | inheritance | validation platform | genes         |
| gy                   | chr21 | 15750519  | 15755509  | 4990      | 15748775                        | 15754006  | 5231   | duplication | mother      | CGH                 | HSPA13        |
| gz                   | chr10 | 54053561  | 55570426  | 1516865   | 54525678                        | 54531534  | 5856   | deletion    | father      | CGH, SNP            | DKK1,MBL2,PC  |
| hi                   | chr12 | 129180374 | 129373289 | 192915    | 129165912                       | 129336953 | 171041 | duplication | father      | CGH, SNP            | GLT1D1,SLC15  |
| hl                   | chr2  | 110690664 | 110975365 | 284701    | 110883210                       | 110983320 | 100110 | deletion    | mother      | CGH, SNP            | LIMS3-LOC440  |
| hi                   | chr6  |           |           |           | 26411364                        | 26467182  | 55818  | deletion    | mother      | SNP                 | BTN3A1, BTN2  |
| hn                   | chr1  | 225965514 | 226034633 | 69119     | 225993806                       | 226028496 | 34690  | deletion    | father      | CGH, SNP            | SRP9,EPHX1    |
| hs                   | chr17 | 10204182  | 10263505  | 59323     | 10207809                        | 10254757  | 46948  | deletion    | mother      | CGH, SNP            | MYH13         |
| hx                   | chr6  | 3123890   | 3129432   | 5542      | 3119466                         | 3129905   | 10439  | duplication | mother      | CGH                 | BPHL          |
| ih                   | chr19 | 45261980  | 45303707  | 41727     | 45284031                        | 45296810  | 12779  | duplication | father      | CGH                 | BCL3,CBLC     |
| ii                   | chr4  | 113360841 | 113502958 | 142117    | 113390782                       | 113487520 | 96738  | duplication | mother      | CGH                 | ALPK1,NEUROD  |
| in                   | chr14 | 69922448  | 69969596  | 47148     | 69922607                        | 69972990  | 50383  | duplication | father      | CGH                 | FLJ44817,SLC3 |
| in                   | chr15 | 22835915  | 23205198  | 369283    | 22789022                        | 23140114  | 351092 | deletion    | mother      | CGH, SNP            | TUBGCP5,CYFI  |
| ip                   | chr17 | 41201137  | 41958957  | 757820    | 41215805                        | 41952726  | 736921 | duplication | father      | CGH                 | ARL4D,BRCA1,  |
| iq                   | chr10 | 14974852  | 15106501  | 131649    | 14987110                        | 15027214  | 40104  | deletion    | mother      | CGH, SNP            | DCLRE1C,MEIC  |
| ir                   | chr3  | 17333386  | 17665405  | 332019    | 17390957                        | 17487701  | 96744  | deletion    | mother      | CGH                 | TBC1D5        |
| ir                   | chr3  | 53317449  | 53326857  | 9408      | 53317500                        | 53329768  | 12268  | deletion    | mother      | CGH                 | DCP1A         |
| jp                   | chr2  | 32631566  | 33246273  | 614707    | 32832625                        | 33320957  | 488332 | duplication | father      | SNP                 | BIRC6,LTBP1,T |
| ka                   | chr1  | 89270073  | 89301937  | 31864     | 89266173                        | 89304701  | 38528  | duplication | mother      | CGH                 | PKN2          |
| kb                   | chr4  | 47514520  | 47905340  | 390820    | 47585672                        | 47896236  | 310564 | duplication | father      | CGH                 | ATP10D,CORIN  |
| ks                   | chr15 | 85681027  | 86189185  | 508158    | 85815949                        | 86140791  | 324842 | duplication | mother      | CGH, SNP            | AKAP13        |
| kx                   | chr12 | 76478346  | 76881398  | 403052    | 76683857                        | 76982825  | 298968 | duplication | father      | SNP                 | BBS10,OSBPL8  |
| t                    | chr23 | 69454504  | 69572506  | 118002    | 69438694                        | 69582975  | 144281 | duplication | mother      | CGH                 | ARR3,AWAT1,I  |
| v                    | chr9  | 4576000   | 4625566   | 49566     | 4588700                         | 4606335   | 17635  | deletion    | father      | CGH                 | SLC1A1,C9orf6 |
| v                    | chr23 | 46322182  | 46457837  | 135655    | 46289765                        | 46412525  | 122760 | duplication | mother      | CGH                 | KRBOX4 ZNF67  |

AVG 377073

MAX 8797840

MIN 5231

**Supplementary Table 3: de novo CNVs in 43 individuals confirmed by chromosome microarray**

**Validated de novo CNVs**

| Trio | hg19 breakpoints            | size (bp)  | CNV type    | inheritance | validation platform | pl likely pathogenic? |
|------|-----------------------------|------------|-------------|-------------|---------------------|-----------------------|
| ad   | chr1:145414781-145688220    | 273,439    | duplication | de novo     | pending             |                       |
| ig   | chr1:91360000-91500000      | 140,000    | duplication | de novo     | CGH                 |                       |
| iz   | chr14:67191043-67775790     | 584,747    | deletion    | de novo     | CGH                 | Y                     |
| * fu | chr15:100595065-102413897   | 1,818,832  | deletion    | de novo     | CGH                 | Y                     |
| ag   | chr15:20,538,067-32,549,762 | 12,011,695 | duplication | de novo     | CGH                 | Y                     |
| * gq | chr15:20083496-28511775     | 8,428,279  | duplication | de novo     | CGH, SNP            | Y                     |
| eh   | chr15:23632712-28616967     | 4,984,255  | duplication | de novo     | CGH                 | Y                     |
| * fu | chr16:73989288-90294753     | 16,305,465 | duplication | de novo     | CGH                 | Y                     |
| fx   | chr2:159451725-166948342    | 7,496,617  | duplication | de novo     | CGH                 | Y                     |
| * iq | chr2:166787061-167083214    | 296,153    | deletion    | de novo     | CGH, SNP            | Y                     |
| aib  | chr2:242109195-242263656    | 154,461    | deletion    | de novo     | SNP                 |                       |
| hj   | chr5:7897177-11732384       | 3,835,207  | deletion    | de novo     | CGH                 | Y                     |
| * gc | chr7:100678748-101301362    | 622,614    | deletion    | de novo     | CGH                 | Y                     |
| ahp  | chr7:120593357-120687047    | 93,690     | duplication | de novo     | SNP                 |                       |
| cy   | chr7:75157776-86595291      | 11,437,515 | deletion    | de novo     | CGH                 | Y                     |
| le   | chr8:6320000-6480000        | 160,000    | deletion    | de novo     | CGH                 |                       |
| aia  | chr9:1-8733843              | 8,733,843  | deletion    | de novo     | SNP                 | Y                     |

\* present in one of the 43 validation samples

AVG 4,551,577  
 MAX 16,305,465  
 MIN 93,690

16 patients with de novo CNV(s) 4.75%

**Predicted but not validated in 43 individuals**

| trio | predicted hg19 breakpoints | size (bp) | event type  | inheritance | validation platform |
|------|----------------------------|-----------|-------------|-------------|---------------------|
| ac   | chr17:80011149-80038114    | 26965     | duplication | de novo     | CGH                 |
| be   | chr12:104099409-104109666  | 10257     | duplication | de novo     | CGH                 |
| be   | chr17:1494859-1543960      | 49101     | duplication | de novo     | CGH                 |
| bs   | chr8:145641193-145656534   | 15341     | deletion    | de novo     | CGH                 |
| aq   | chr6:159004985-159050851   | 45866     | deletion    | de novo     | CGH                 |
| aq   | chr9:127176186-127230103   | 53917     | duplication | de novo     | CGH                 |
| gc   | chr3:49322281-49348170     | 25889     | duplication | de novo     | CGH                 |
| fu   | chr12:98909441-98987913    | 78472     | duplication | de novo     | CGH                 |
| fu   | chr16:31392217-31419237    | 27020     | deletion    | de novo     | CGH                 |
| gk   | chr12:9020825-9075384      | 54559     | duplication | de novo     | CGH                 |
| hx   | chr9:86582998-86587104     | 4106      | deletion    | de novo     | CGH                 |
| ih   | chr18:77090011-77134101    | 44090     | deletion    | de novo     | CGH                 |
| be   | chr3:113327265-113380272   | 53007     | duplication | de novo     | CGH                 |
| b    | chr10:67748449-68040379    | 291930    | deletion    | de novo     | CGH                 |
| gk   | chr10:13803646-14572514    | 768868    | deletion    | de novo     | CGH                 |
| ip   | chr10:27399384-27409476    | 10092     | duplication | de novo     | CGH                 |

**Supplementary Table 4: All validated, inherited CNVs**

| <b>trio</b> | <b>breakpoints</b>        | <b>size (bp)</b> | <b>event type</b> | <b>inheritance</b> | <b>validation platform</b> |
|-------------|---------------------------|------------------|-------------------|--------------------|----------------------------|
| ac          | chrX:74505779-74606768    | 100989           | duplication       | mother             | CGH                        |
| ah          | chr3:185131753-187214923  | 2083170          | duplication       | father             | CGH, SNP                   |
| ai          | chr7:16918472-17407061    | 488589           | duplication       | mother             | SNP                        |
| aq          | chr10:15009109-15060883   | 51774            | duplication       | father             | SNP                        |
| aq          | chr3:45671268-45871203    | 199935           | deletion          | mother             | CGH, SNP                   |
| be          | chr9:108206884-108302402  | 95518            | deletion          | father             | CGH                        |
| bs          | chr16:2928181-2998053     | 69872            | deletion          | father             | CGH                        |
| bs          | chr22:22313954-22560977   | 247023           | duplication       | father             | SNP                        |
| bs          | chr7:110965837-111321438  | 355601           | deletion          | mother             | CGH, SNP                   |
| cr          | chr9:132507232-132783902  | 276670           | duplication       | mother             | CGH                        |
| cz          | chr21:40776019-40809714   | 33695            | duplication       | father             | CGH                        |
| cz          | chr7:7120557-7313294      | 192737           | duplication       | mother             | SNP                        |
| db          | chr5:110416995-110446579  | 29584            | duplication       | mother             | CGH                        |
| dg          | chr1:91988685-92130915    | 142230           | deletion          | mother             | CGH                        |
| dj          | chr1:206316872-206327339  | 10467            | deletion          | father             | CGH                        |
| dl          | chr17:10348288-10358006   | 9718             | deletion          | father             | SNP                        |
| dz          | chr1:169574047-169580274  | 6227             | deletion          | mother             | CGH                        |
| eb          | chr17:3492855-3560888     | 68033            | deletion          | father             | CGH                        |
| ff          | chr9:207735-361025        | 153290           | duplication       | father             | CGH                        |
| fh          | chr7:17040227-17436278    | 396051           | duplication       | mother             | CGH, SNP                   |
| fp          | chr21:33632971-33645249   | 12278            | duplication       | mother             | CGH                        |
| fu          | chr22:24346991-24395156   | 48165            | deletion          | mother             | CGH                        |
| fw          | chr14:61607162-62476906   | 869744           | duplication       | mother             | CGH                        |
| fy          | chr1:162411286-162486355  | 75069            | duplication       | father             | CGH                        |
| fy          | chrX:32446527-32628462    | 181935           | deletion          | father             | CGH                        |
| gc          | chr21:34641156-34835149   | 193993           | duplication       | father             | CGH                        |
| gi          | chr1:92303122-92578324    | 275202           | duplication       | mother             | CGH                        |
| gk          | chr1:206311019-206331706  | 20687            | deletion          | father             | CGH                        |
| gk          | chr17:71841082-72718161   | 877079           | duplication       | father             | CGH                        |
| gk          | chr19:40969518-41038340   | 68822            | duplication       | mother             | CGH                        |
| gq          | chr1:187227118-196024958  | 8797840          | duplication       | father             | CGH, SNP                   |
| gs          | chr9:201140-378149        | 177009           | duplication       | father             | CGH                        |
| gs          | chr3:182841152-182923907  | 82755            | duplication       | father             | CGH                        |
| gx          | chr22:22312863-22330179   | 17316            | duplication       | father             | CGH                        |
| gy          | chr21:15748775-15754006   | 5275             | duplication       | mother             | CGH                        |
| gz          | chr10:54525678-54531534   | 5856             | deletion          | father             | SNP                        |
| ha          | chr11:134152030-134194937 | 42907            | deletion          | mother             | SNP                        |

| <b>trio</b> | <b>breakpoints</b>        | <b>size (bp)</b> | <b>event type</b> | <b>inheritance</b> | <b>validation platform</b> |
|-------------|---------------------------|------------------|-------------------|--------------------|----------------------------|
| hi          | chr12:129165912-129336953 | 171041           | duplication       | father             | CGH, SNP                   |
| hi          | chr6:26411364-26467182    | 55818            | deletion          | mother             | SNP                        |
| hl          | chr2:110828463-110973573  | 100110           | deletion          | mother             | CGH, SNP                   |
| hl          | chr8:68020804-68135095    | 114291           | duplication       | mother             | CGH                        |
| hn          | chr1:225993806-226028496  | 34690            | deletion          | father             | CGH, SNP                   |
| hs          | chr17:10207809-10254757   | 46948            | deletion          | mother             | CGH, SNP                   |
| hx          | chr6:3119466-3129905      | 10439            | duplication       | mother             | CGH                        |
| ib          | chr1:185106737-185137530  | 30793            | duplication       | unknown            | CGH                        |
| ie          | chr3:151514590-151538170  | 23580            | deletion          | mother             | SNP                        |
| ih          | chr19:45284031-45296810   | 12779            | duplication       | father             | CGH                        |
| ii          | chr4:113390782-113487520  | 96738            | duplication       | mother             | CGH                        |
| in          | chr14:69922607-69972990   | 50383            | duplication       | father             | CGH                        |
| in          | chr15:22764593-23173181   | 351092           | deletion          | mother             | CGH, SNP                   |
| ip          | chr17:41215805-41952726   | 736921           | duplication       | father             | CGH                        |
| iq          | chr10:14987110-15027214   | 40104            | deletion          | mother             | CGH, SNP                   |
| ir          | chr3:17390957-17487701    | 96744            | deletion          | mother             | CGH                        |
| ir          | chr3:53317500-53329768    | 12268            | deletion          | mother             | CGH                        |
| iv          | chr12:21578559-21629928   | 51369            | duplication       | father             | SNP                        |
| jp          | chr2:32832625-33320957    | 488332           | duplication       | father             | SNP                        |
| js          | chr17:402843-488260       | 85417            | deletion          | father             | SNP                        |
| ju          | chr8:15948235-16021468    | 73233            | deletion          | mother             | SNP                        |
| jy          | chr10:135256762-135353499 | 96737            | deletion          | mother             | SNP                        |
| jy          | chr4:71171720-71275301    | 103581           | deletion          | mother             | SNP                        |
| jz          | chr11:6740308-6805900     | 65592            | deletion          | mother             | SNP                        |
| ka          | chr1:89266173-89304701    | 38528            | duplication       | mother             | CGH                        |
| kb          | chr4:47585672-47896236    | 310564           | duplication       | father             | CGH                        |
| ks          | chr15:85815949-86140791   | 324842           | duplication       | mother             | SNP                        |
| kx          | chr12:76683857-76982825   | 298968           | duplication       | father             | SNP                        |
| kz          | chr6:137282117-137361670  | 79553            | deletion          | father             | SNP                        |
| t           | chrX:69438694-69582975    | 144281           | duplication       | mother             | CGH                        |
| v           | chrX:46289765-46412525    | 122760           | duplication       | mother             | CGH                        |
| v           | chr9:4588700-4606335      | 17635            | deletion          | father             | CGH                        |

**AVERAGE SIZE**

**305061**

**MAX**

**8797840**

**MIN**

**5275**

































**SUPPLEMENTARY TABLE 7: Detailed phenotypes of patients with de novo CNVs**

| TRIO CNV                                                                                                                       | Age at onset                            | First seizure type                  | Additional seizure types                                                                     | EEG                                                                                                                                                               | MRI                                                                         | DEV prior                          | DEV                                                                                                                                                                     | OTHER                                                                             |
|--------------------------------------------------------------------------------------------------------------------------------|-----------------------------------------|-------------------------------------|----------------------------------------------------------------------------------------------|-------------------------------------------------------------------------------------------------------------------------------------------------------------------|-----------------------------------------------------------------------------|------------------------------------|-------------------------------------------------------------------------------------------------------------------------------------------------------------------------|-----------------------------------------------------------------------------------|
| iq 2q24 deletion including <i>SCN1A</i>                                                                                        | < 1 yr                                  | unk                                 | GTC, atypical absence                                                                        | background slowing and disorganization, bilateral independent sharp waves                                                                                         | subtle abnormality of R hippocampus with loss of internal architecture      | normal                             | mild ID, FSIQ=60; working ~3 grade levels below expected; obsessive compulsive tendencies                                                                               |                                                                                   |
| fx 2q24 duplication encompassing <i>SCN2A</i>                                                                                  | 7 mo                                    | IS                                  | none                                                                                         | hypersarrhythmia, burst suppression type in sleep                                                                                                                 | normal                                                                      | normal                             | developmental arrest with seizure onset; global delays at 12 mo; motor skills caught up by 2 yrs                                                                        |                                                                                   |
| eh 15q11q13 dup, 5 Mb                                                                                                          | 2 wks                                   | IS                                  | multiple                                                                                     | initial EEG normal; repeat EEG, hypersarrhythmia; at 8 mo, diffuse slow background, frequent bilateral sharp epileptiform discharges; at 5 yrs, ESES during sleep | diffuse hypomyelination, brain atrophy at 7 mo                              | normal                             | significant delays; at 6 yrs, sits supported, has 2-3 words, follows simple commands, uses communication board                                                          | ex-35-week premature infant; spastic quadriplegia; hypogammaglobulinemia          |
| gq 15q11q13 dup, 8.4 Mb                                                                                                        | 8 mo                                    | convulsive                          | GTC, tonic, atonic                                                                           | generalized slowing; frequent generalized slow spike wave discharges                                                                                              | generalized atrophy                                                         | mild delays by 3-4 mo              | severe delays; at 21 yrs, no meaningful interactions at 8mo, not rolling or sitting; global delays                                                                      | spastic quadriplegia                                                              |
| ag 47,XY psu dic(15;15)(q13;q13) unbalanced translocation resulting in 15q26 deletion (1.8 Mb) and 16q22 duplication (16.3 Mb) | 8 mo                                    | IS                                  | none reported                                                                                | hypersarrhythmia                                                                                                                                                  | normal                                                                      | mild to moderate gross motor delay |                                                                                                                                                                         |                                                                                   |
| fu                                                                                                                             | 8 mo                                    | IS                                  | none reported                                                                                | hypersarrhythmia                                                                                                                                                  | dysgenesis of corpus callosum, mild prominence of extra-axial fluid         | delayed                            | unk                                                                                                                                                                     | multiple anomalies: hypospadias with chordee, esotropia, narrow airway, small jaw |
| hj 5p15 deletion                                                                                                               | 6 mo                                    | Febrile seizure                     | focal, GTC, frequent status, atypical absence; refractory despite callosotomy, VNS placement | multifocal spike, polyspike and spike wave discharges                                                                                                             | normal                                                                      | unk                                | significant delays; nonverbal at 13 yrs, in wheelchair                                                                                                                  | chronic esophagitis                                                               |
| cy 7q11 deletion                                                                                                               | 3 mo                                    | IS                                  | atypical absence                                                                             | hypersarrhythmia with superimposed multifocal independent spike/wave discharges                                                                                   | mild prominence of 3rd and 4th ventricles, mild thinning of corpus callosum | normal                             | severe delays, few words at 5 years, cognitive functioning at level of 1-2 yo                                                                                           |                                                                                   |
| iz 14q23 (GPHN) deletion                                                                                                       | 2.5 yrs (prior had one FS as a toddler) | febrile status epilepticus          | refractory tonic seizures; drop seizures                                                     | generalized slowing with frequent runs of slow spike-wave discharges                                                                                              | normal                                                                      | normal                             | mild language delay                                                                                                                                                     | microcephaly                                                                      |
| aia 9pter deletion                                                                                                             | 5 mo                                    | IS                                  | none noted by 7 mo                                                                           | disorganized background, multifocal spike discharges, modified hypersarrhythmia                                                                                   | normal                                                                      | reported normal                    | hypotonic, head lag at 6 mo; not reaching, rolling, babbling at 7 mo; mild to moderate intellectual disability, lives in a group home as an adult; behavioral outbursts | small muscular VSD; undescended testes                                            |
| ig 1p22 (ZNF644) duplication                                                                                                   | 2 yrs                                   | absence                             | at 5 yrs, developed GTC, also myoclonic, drop attacks, tonic seizures                        | generalized abnormalities; focal sharps; paroxysmal fast bursts                                                                                                   | evidence of callosotomy and resection                                       | unk                                | regression following seizure onset, moderate developmental, behavioral, attention, speech delays with minimal verbal output                                             |                                                                                   |
| le 8p23 deletion                                                                                                               | 3 yrs 10 mo                             | GTC at 3yr 10 mo then drop at 4 yrs | GTC, tonic, myoclonic, atypical absence, absence, atonic; all refractory                     | generalized slow spike wave discharges, polyspikes, bilateral independent spikes                                                                                  | normal                                                                      | normal                             | IQ 80; language delay; ADHD; normal motor development                                                                                                                   |                                                                                   |
| gc 7q22 deletion                                                                                                               | 8 mo                                    | IS, responded to ACTH               | none                                                                                         | hypersarrhythmia                                                                                                                                                  | normal                                                                      | unk                                |                                                                                                                                                                         |                                                                                   |
| ad 1q21 (TAR) duplication                                                                                                      | 8 mo                                    | IS                                  | none                                                                                         | hypersarrhythmia, multifocal spike, polyspike and spike wave discharges                                                                                           | normal                                                                      | unk                                | unk                                                                                                                                                                     |                                                                                   |
| ahp 7q31 duplication                                                                                                           | 7 mo                                    | IS, responded to ACTH               | none                                                                                         | hypersarrhythmia                                                                                                                                                  | normal                                                                      | normal                             | mild speech delay at 12 mo, otherwise normal                                                                                                                            |                                                                                   |
| aib 2q37 deletion                                                                                                              | 5 mo                                    | IS                                  | tonic, clusters of spasms                                                                    | hypersarrhythmia, multifocal spike, polyspike and spike wave discharges                                                                                           | normal                                                                      | normal                             | crawled at 18 mo, walked at 2 1/2 yrs, nonverbal                                                                                                                        | autism spectrum disorder                                                          |
| bda 17q12 del                                                                                                                  | 8 mo                                    | IS                                  | myoclonic, myoclonic status, generalized                                                     | Diffuse encephalopathy, slight response to pyridoxine                                                                                                             | Cerebellar atrophy, cranial thickening                                      | normal                             | Nonverbal, severe ID                                                                                                                                                    | Normal fasting glucose at 43 yrs                                                  |
